# Supplementary material
Source: publisher site journal article supplement (https://www.dovepress.com/article/427990)
Supplement: Supplementary file 1 [file get_supplementary_file.php]

**Supplementary figure file**


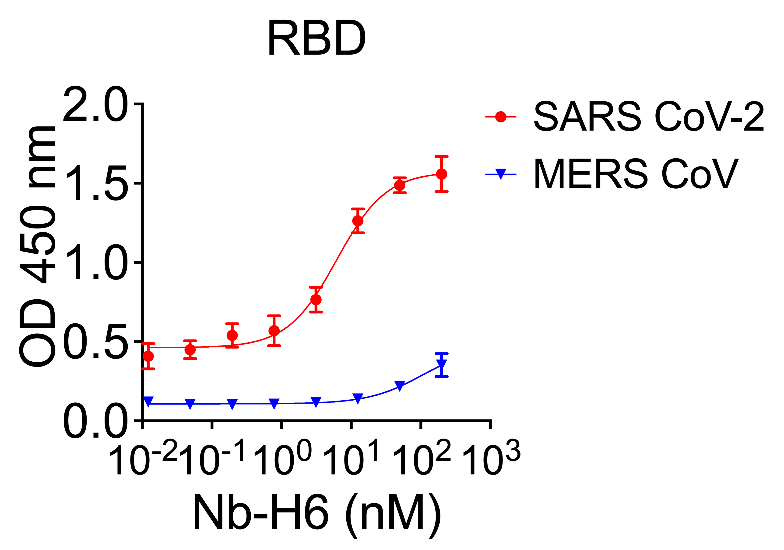


**Supplementary Figure 1. Nb-H6 can barely interact with MERS-CoV RBD.** Nb-H6 (200, 50, 12.5, 3.12, 0.78, 0.19, 0.049, and 0.012 nM) was serially diluted and incubated with RBD of MERS-CoV or SARS-CoV-2 at the same concentration (4 μg/mL). The results are presented as mean absorbance values at OD450 nm ± SD (n = 3).
